# Supplementary material for: Mulberry leaf alleviates streptozotocin-induced diabetic rats by attenuating NEFA signaling and modulating intestinal microflora
Source: PubMed Central journal article supplement (PMC5608946; doi:10.1038/s41598-017-12245-2), 2017-09-21
Supplement: 41598_2017_12245_MOESM1_ESM.pdf [file 41598_2017_12245_MOESM1_ESM.pdf]

# **Mulberry leaf alleviates streptozotocin-induced diabetic rats by attenuating NEFA signaling and modulating intestinal microflora**

Yao Sheng<sup>a</sup>, Shujuan Zheng<sup>a</sup>, Tianshi Ma<sup>a</sup>, Chuanhai Zhang<sup>a</sup>, Xiaoqun Ou<sup>a</sup>, Xiaoyun He<sup>a,b</sup>, Wentao Xu<sup>a,b</sup>, Kunlun Huang<sup>a,b\*</sup>

<sup>a</sup> Beijing Advanced Innovation Center for Food Nutrition and Human Health, College of Food Science and Nutritional Engineering, China Agricultural University, Beijing, China, 100083.

<sup>b</sup> Key Laboratory of Safety Assessment of Genetically Modified Organism (Food Safety), Ministry of Agriculture, Beijing, China, 100083.

Running Title: Mulberry leaf alleviates diabetes by reducing NEFAs and restoring intestinal microbiota communities

\*Corresponding author:

Dr. Kunlun Huang

College of Food Science and Nutritional Engineering, China Agricultural University,  
No. 17 Tsinghua East Road Beijing, China, 100083.

Fax/Phone: (8610)62738552; E-mail: foodsafety66@cau.edu.cn

**Table S1. Methods for Composition Analysis**

| Composition parameters | Method                                                                                                                                                                                                        |
|------------------------|---------------------------------------------------------------------------------------------------------------------------------------------------------------------------------------------------------------|
| Moisture               | Chinese standard GB 5009.3-2010. 2010. National food safety standard: Determination of moisture in foods. Standards Press of China, Beijing, China.                                                           |
| Ash                    | Chinese standard GB 5009.4-2010. 2010. National food safety standard: Determination of ash in foods. Standards Press of China, Beijing, China.                                                                |
| Protein                | Chinese standard GB 5009.5-2010. 2010. National food safety standard: Determination of protein in foods. Standards Press of China, Beijing, China.                                                            |
| Crude Fiber            | Chinese standard GB/T 5009.10-2003. 2003. National food safety standard: Determination of crude fiber in vegetable foods. Standards Press of China, Beijing, China.                                           |
| Fat                    | Chinese standard GB/T 5009.6-2003. 2003. National food safety standard: Determination of fat in foods. Standards Press of China, Beijing, China.                                                              |
| Calcium                | Chinese standard GB/T 5009.92-2003. 2003. National food safety standard: Determination of calcium in foods. Standards Press of China, Beijing, China.                                                         |
| Zinc                   | Chinese standard GB/T 5009.91-2003. 2003. National food safety standard: Determination of zinc in foods. Standards Press of China, Beijing, China.                                                            |
| Copper                 | Chinese standard GB/T 5009.13-2003. 2003. National food safety standard: Determination of copper in foods. Standards Press of China, Beijing, China.                                                          |
| Manganese              | Chinese standard GB/T 5009.90-2003. 2003. National food safety standard: Determination of iron, magnesium and manganese in foods. Standards Press of China, Beijing, China.                                   |
| Potassium              | Chinese standard GB/T 5009.91-2003. 2003. National food safety standard: Determination of potassium and sodium in foods. Standards Press of China, Beijing, China.                                            |
| Phosphorus             | Chinese standard GB/T 5009.87-2003. 2003. National food safety standard: Determination of phosphorus in foods. Standards Press of China, Beijing, China.                                                      |
| Vitamin E              | Chinese standard GB/T 5009.82-2003. 2003. National food safety standard: Determination of retinol and tocopherol in foods. Standards Press of China, Beijing, China.                                          |
| Vitamin B1             | Chinese standard GB 5413.11-2010. 2010. National food safety standard: Determination of vitamin B1 in foods for infants and young children, milk and milk products. Standards Press of China, Beijing, China. |
| Vitamin B2             | Chinese standard GB 5413.12-2010. 2010. National food safety standard: Determination of vitamin B2 in foods for infants and young children, milk and milk products. Standards Press of China, Beijing, China. |
| Fatty acids            | Chinese standard GB/T 21514-2008. 2008. Determination of fatty acids in feeds. Standards Press of China, Beijing, China.                                                                                      |
| Polysaccharides        | Chinese standard NY/T 1676-2008. 2008. National food safety standard:                                                                                                                                         |

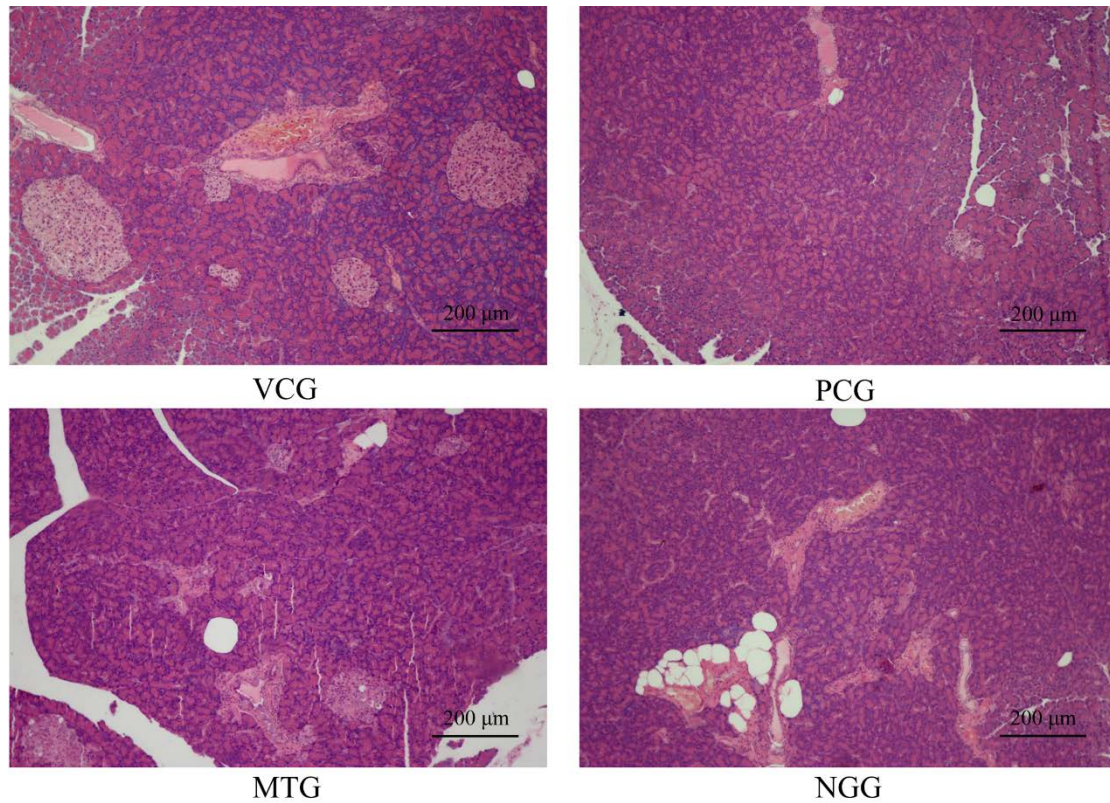

Figure S1. Histological data on pancreas (H & E stain). Diabetic rat induced by STZ posed significantly damaged pancreas islet as showed in figure S1 (NCG, PCG and MTG). The number and size of pancreas islet were decreased; mass of necrocytosis were observed in pancreas islet  $\beta$ -cell; in addition, vacuolization was found in pancreas in NCG. However, mulberry leaf treatment could inhibit necrocytosis and vacuolization indicating beneficial effect in protecting pancreas and pancreas islet damaged by STZ.

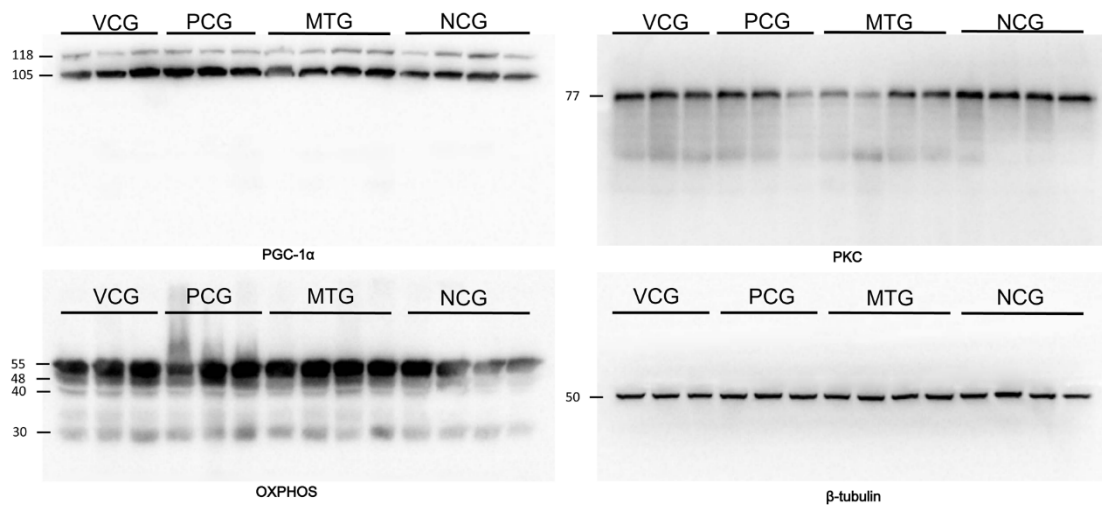

Figure S2. Western blot for protein in liver tissue, mulberry leaf decreased PKC and increased OXPPOS expression.  $\beta$ -tubulin serves as a loading control. For presentation purposes additional lanes were excised. PKC, PGC-1 $\alpha$ , OXPPOS and  $\beta$ -tubulin were cropped from different parts of the same gel. These proteins were stained one by one after using Restore™ Western Blot Stripping Buffer (Thermo Scientific, USA).

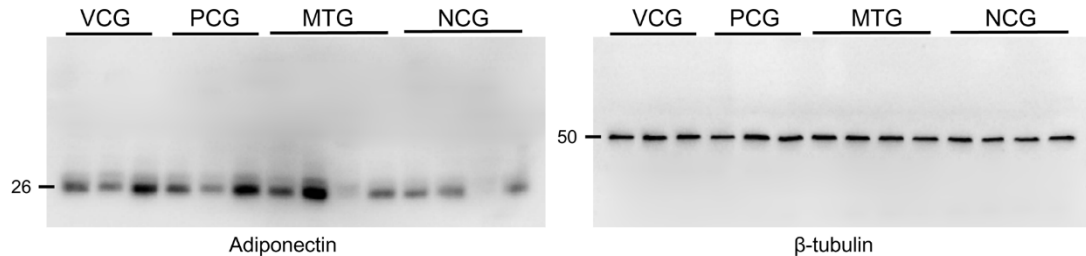

Figure S3. Western blot for protein in subcutaneous fat, mulberry leaf increased adiponectin expression in subcutaneous fat.  $\beta$ -tubulin serves as a loading control. For presentation purposes additional lanes were excised. Adiponectin and  $\beta$ -tubulin were cropped from different parts of the same gel. Both proteins were stained one by one after using Restore™ Western Blot Stripping Buffer (Thermo Scientific, USA).

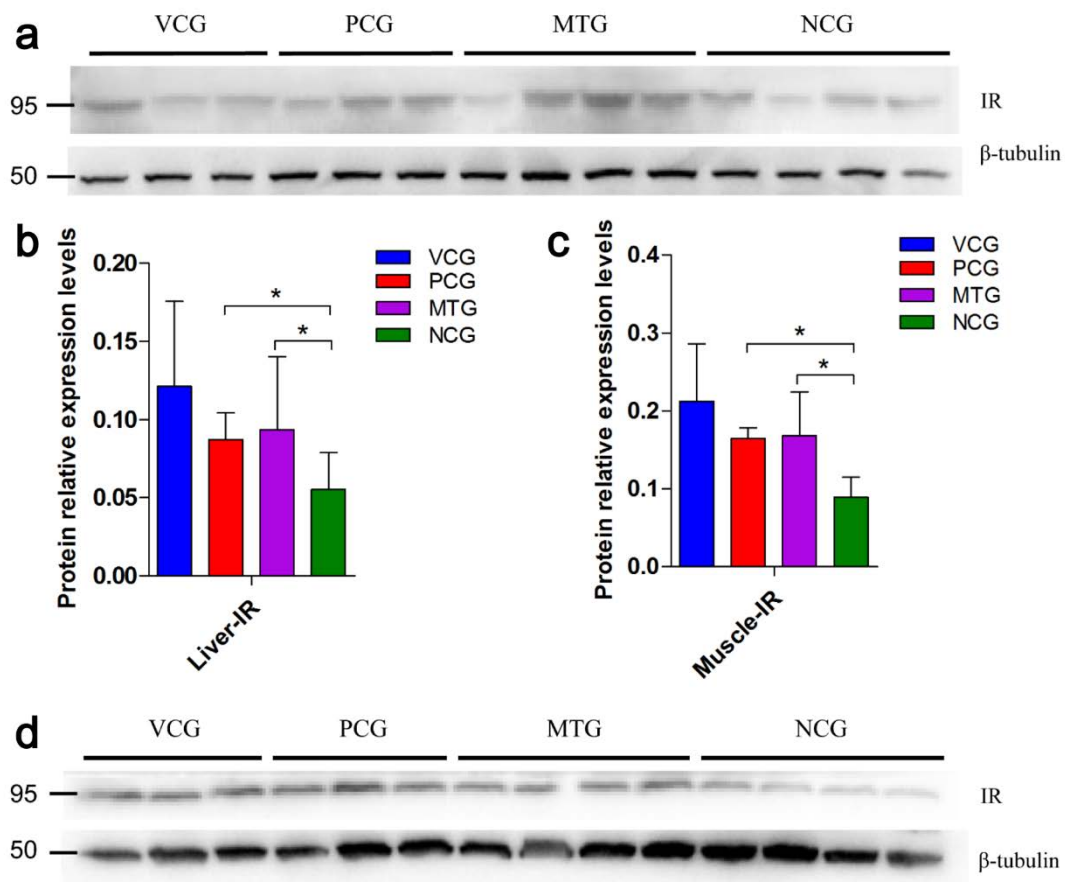

Figure S4. Insulin receptors (IR) expression in peripheral tissue. **(a, b)** Western blot for insulin receptor (IR) in liver tissue. **(c, d)** Western blot for insulin receptor (IR) in muscle tissue. IR was significantly ( $P < 0.05$ ) up-regulated in peripheral tissue (liver and muscle) of both mulberry leaf and glibenclamide treatments groups at post-translation level.  $\beta$ -tubulin serves as a loading control. For presentation purposes additional lanes were excised. IR and  $\beta$ -tubulin were cropped from different parts of the same gel. Both proteins were stained one by one after using Restore™ Western Blot Stripping Buffer (Thermo Scientific, USA). \*  $P < 0.05$  compared with NCG. Value=mean  $\pm$  SD (N=3-4).

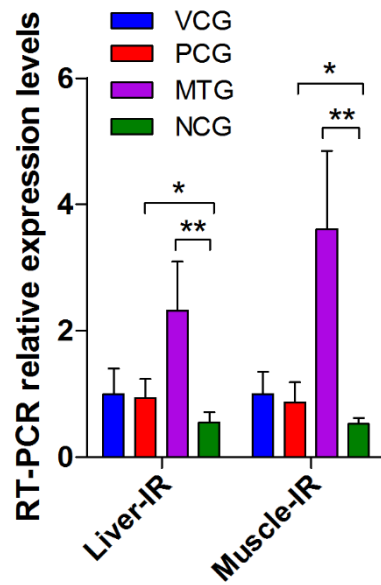

Figure S5, IR expression on RT-PCR, IR was significantly up-regulated in peripheral tissue (liver and muscle) of both mulberry leaf ( $P < 0.01$ ) and glibenclamide ( $P < 0.05$ ) treatments groups at transcription level. \*  $P < 0.05$  compared with NCG, \*\*  $P < 0.01$  compared with NCG. Value=mean  $\pm$  SD (N=6).

Table S2. The primers used in reverse transcription-PCR analysis

| Gene           | Primer sequences (forward) | Primer sequences (Reverse) | Amplicon length (bp) | TM ( $^{\circ}$ C) |
|----------------|----------------------------|----------------------------|----------------------|--------------------|
| Adiponectin    | CTACTGTTGCAAGCTCTCC        | CTTCACATCTTTCATGTACACC     | 513                  | 55                 |
| ADPR1          | CTTCTACTGCTCCCCACAGC       | TCCAGGAACACTCCTGCTC        | 139                  | 60                 |
| ADPR2          | TGTAAGGTGTGGGAAGGTCG       | GGAAAGAAGGCATAGGAGGC       | 112                  | 58                 |
| PGC-1 $\alpha$ | AGTTTTTGGTGAAATTGAGGAAT    | TCATACTTGCTCTTGGTGGAAGC    | 249                  | 58                 |
| AK2            | GTGACCTTGCTGTCTGAGAA       | TCCGCTTGTGGAATACTACA       | 240                  | 57                 |
| PKC1           | CAACCAAGAGGAGGGTGAAT       | CACTGTCTGGAAGCAGGAGT       | 397                  | 58                 |
| IR             | GGCGAGAAGACCATTGATT        | AAGTGACACCAGAGCATAGGA      | 189                  | 58                 |
| $\beta$ -actin | GTCAGGTCATCACTATCGGCAAT    | AGAGGTCTTTACGGATGTCAACGT   | 147                  | 60                 |

Table S3. Nutritional proximates, vitamins, minerals of mulberry leaf powder. Value=mean  $\pm$  SD (N=3)

| Substance            | Concentration      |
|----------------------|--------------------|
| Protein (%)          | 19.6 $\pm$ 1.6     |
| Crude fibre (%)      | 11.200 $\pm$ 0.889 |
| Lipid (%)            | 1.780 $\pm$ 0.153  |
| Vitamin b1 (mg/100g) | 0.002 $\pm$ 0      |
| Vitamin b2 (mg/100g) | 0.738 $\pm$ 0.082  |
| Moisture (%)         | 9.460 $\pm$ 0.681  |
| Ash (%)              | 9.480 $\pm$ 0.549  |
| Kalium (mg/kg)       | 12060 $\pm$ 1086   |
| Calcium (mg/kg)      | 16800 $\pm$ 8075   |
| Sodium (mg/kg)       | 133.8 $\pm$ 9.81   |
| Magnesium (mg/kg)    | 5201 $\pm$ 386     |
| Ferrum (mg/kg)       | 316.7 $\pm$ 27.5   |
| Manganese (mg/kg)    | 44.5 $\pm$ 2.86    |
| Zinc (mg/kg)         | 30.6 $\pm$ 1.46    |
| Cuprum (mg/kg)       | 9.6 $\pm$ 0.56     |
| Phosphorus (mg/kg)   | 4138 $\pm$ 126     |

Table S4. Fatty acids of mulberry leaf powder. Value=mean  $\pm$  SD (N=3)

| Fatty acids | Percentage (%)   |
|-------------|------------------|
| C14:0       | 0.46 $\pm$ 0.021 |
| C16:0       | 18.12 $\pm$ 1.26 |
| C16:1       | 0.12 $\pm$ 0.007 |
| C17:0       | 0.28 $\pm$ 0.011 |
| C18:0       | 3.69 $\pm$ 0.165 |
| C18:1       | 3.00 $\pm$ 0.196 |
| C18:2       | 23.00 $\pm$ 1.83 |
| C18:3       | 39.31 $\pm$ 2.06 |
| C20:0       | 1.54 $\pm$ 0.061 |
| C22:0       | 1.16 $\pm$ 0.087 |
| Others      | 9.32 $\pm$ 0.646 |

Table S5. Body weight (g) changes of all animals. Value=mean  $\pm$  SD (N=6)

| weeks | 0            | 1            | 2            | 3            | 4            | 5            | 6                          | 7                          | 8                          | 9                          | 10                         | 11                        | 12                        | 13                        |
|-------|--------------|--------------|--------------|--------------|--------------|--------------|----------------------------|----------------------------|----------------------------|----------------------------|----------------------------|---------------------------|---------------------------|---------------------------|
| VCG   | 155 $\pm$ 12 | 219 $\pm$ 15 | 285 $\pm$ 22 | 340 $\pm$ 26 | 364 $\pm$ 26 | 375 $\pm$ 28 | 398 $\pm$ 31 <sup>a</sup>  | 419 $\pm$ 33 <sup>a</sup>  | 440 $\pm$ 41 <sup>a</sup>  | 463 $\pm$ 44 <sup>a</sup>  | 483 $\pm$ 46 <sup>a</sup>  | 498 $\pm$ 47 <sup>a</sup> | 512 $\pm$ 45 <sup>a</sup> | 523 $\pm$ 51 <sup>a</sup> |
| PCG   | 155 $\pm$ 9  | 197 $\pm$ 10 | 256 $\pm$ 18 | 319 $\pm$ 22 | 359 $\pm$ 25 | 338 $\pm$ 34 | 342 $\pm$ 58 <sup>ab</sup> | 360 $\pm$ 48 <sup>ab</sup> | 377 $\pm$ 52 <sup>ab</sup> | 383 $\pm$ 55 <sup>ab</sup> | 387 $\pm$ 64 <sup>b</sup>  | 395 $\pm$ 68 <sup>b</sup> | 406 $\pm$ 65 <sup>b</sup> | 412 $\pm$ 70 <sup>b</sup> |
| MTG   | 158 $\pm$ 11 | 203 $\pm$ 16 | 262 $\pm$ 22 | 326 $\pm$ 27 | 367 $\pm$ 25 | 333 $\pm$ 38 | 320 $\pm$ 33 <sup>b</sup>  | 373 $\pm$ 42 <sup>ab</sup> | 383 $\pm$ 55 <sup>ab</sup> | 398 $\pm$ 58 <sup>ab</sup> | 406 $\pm$ 64 <sup>ab</sup> | 411 $\pm$ 65 <sup>b</sup> | 419 $\pm$ 68 <sup>b</sup> | 425 $\pm$ 73 <sup>b</sup> |
| NCG   | 151 $\pm$ 10 | 197 $\pm$ 14 | 252 $\pm$ 20 | 317 $\pm$ 25 | 360 $\pm$ 25 | 324 $\pm$ 26 | 300 $\pm$ 35 <sup>b</sup>  | 263 $\pm$ 36 <sup>b</sup>  | 321 $\pm$ 44 <sup>b</sup>  | 342 $\pm$ 48 <sup>b</sup>  | 348 $\pm$ 40 <sup>b</sup>  | 371 $\pm$ 42 <sup>b</sup> | 376 $\pm$ 45 <sup>b</sup> | 381 $\pm$ 47 <sup>b</sup> |

a P < 0.05 compared with NCG

b P < 0.05 compared with VCG

Table S6. Glucose tolerance test (GTT, mmol/L) of all animals. Value=mean  $\pm$  SD (N=6)

| Time (min) | 0                             | 15                            | 30                           | 60                            | 90                             | 120                           | Area under the curve         |
|------------|-------------------------------|-------------------------------|------------------------------|-------------------------------|--------------------------------|-------------------------------|------------------------------|
| VCG        | 4.2 $\pm$ 0.43 <sup>a</sup>   | 14.9 $\pm$ 1.58 <sup>a</sup>  | 10.7 $\pm$ 1.92 <sup>a</sup> | 6.5 $\pm$ 1.17 <sup>a</sup>   | 5.43 $\pm$ 0.63 <sup>a</sup>   | 5.22 $\pm$ 0.39 <sup>a</sup>  | 1091 $\pm$ 117 <sup>a</sup>  |
| PCG        | 9.7 $\pm$ 3.79 <sup>ab</sup>  | 22.7 $\pm$ 4.22 <sup>ab</sup> | 21.2 $\pm$ 3.9 <sup>ab</sup> | 19.9 $\pm$ 3.55 <sup>ab</sup> | 18.5 $\pm$ 3.51 <sup>ab</sup>  | 16.22 $\pm$ 3.7 <sup>ab</sup> | 2808 $\pm$ 311 <sup>ab</sup> |
| MTG        | 10.1 $\pm$ 3.62 <sup>ab</sup> | 21.8 $\pm$ 2.53 <sup>ab</sup> | 24.1 $\pm$ 4.46 <sup>b</sup> | 21.6 $\pm$ 4.83 <sup>ab</sup> | 20.23 $\pm$ 3.97 <sup>ab</sup> | 16.7 $\pm$ 3.01 <sup>ab</sup> | 3002 $\pm$ 467 <sup>ab</sup> |
| NCG        | 16.8 $\pm$ 1.2 <sup>b</sup>   | 26.6 $\pm$ 2.12 <sup>b</sup>  | 27.4 $\pm$ 0.86 <sup>b</sup> | 27.2 $\pm$ 3.07 <sup>b</sup>  | 26.18 $\pm$ 1.71 <sup>b</sup>  | 23.98 $\pm$ 1.48 <sup>b</sup> | 3854 $\pm$ 144 <sup>b</sup>  |

a P < 0.05 compared with NCG

b P < 0.05 compared with VCG

Table S7. Fasting blood glucose levels (mmol/L) of all animals. Value=mean  $\pm$  SD (N=6)

| Time (day) | F               | 0                             | 3                             | 14                            | 30                             | 45                            | 60                             |
|------------|-----------------|-------------------------------|-------------------------------|-------------------------------|--------------------------------|-------------------------------|--------------------------------|
| VCG        | 4.7 $\pm$ 0.38  | 5.18 $\pm$ 0.25 <sup>a</sup>  | 5.23 $\pm$ 0.66 <sup>a</sup>  | 5.05 $\pm$ 0.37 <sup>a</sup>  | 5.4 $\pm$ 0.48 <sup>a</sup>    | 4.75 $\pm$ 0.5 <sup>a</sup>   | 4.56 $\pm$ 0.52 <sup>a</sup>   |
| PCG        | 5.19 $\pm$ 0.43 | 14.5 $\pm$ 6.27 <sup>b</sup>  | 17.14 $\pm$ 5.89 <sup>b</sup> | 16.91 $\pm$ 5.94 <sup>b</sup> | 14.63 $\pm$ 5.64 <sup>ab</sup> | 11.24 $\pm$ 5.7 <sup>ab</sup> | 9.94 $\pm$ 4.83 <sup>ab</sup>  |
| MTG        | 5.1 $\pm$ 0.46  | 14.44 $\pm$ 4.43 <sup>b</sup> | 15.21 $\pm$ 4.47 <sup>b</sup> | 14.99 $\pm$ 5.06 <sup>b</sup> | 12.74 $\pm$ 3.68 <sup>ab</sup> | 10.83 $\pm$ 4.3 <sup>ab</sup> | 10.08 $\pm$ 3.23 <sup>ab</sup> |
| NCG        | 4.76 $\pm$ 0.48 | 14.48 $\pm$ 6.22 <sup>b</sup> | 21.81 $\pm$ 7.18 <sup>b</sup> | 19.3 $\pm$ 5.66 <sup>b</sup>  | 20.4 $\pm$ 1.63 <sup>b</sup>   | 19.94 $\pm$ 1.38 <sup>b</sup> | 18.64 $\pm$ 2.43 <sup>b</sup>  |

a P < 0.05 compared with NCG

b P < 0.05 compared with VCG

Table S8. HbA1c proportion (%) of all animals. Value=mean  $\pm$  SD (N=6)

|               | VCG                          | PCG                           | MTG                          | NCG                          |
|---------------|------------------------------|-------------------------------|------------------------------|------------------------------|
| sample 1      | 1.6                          | 2.1                           | 2.4                          | 2.6                          |
| sample 2      | 1.5                          | 2.6                           | 2.4                          | 2.9                          |
| sample 3      | 1.5                          | 2.2                           | 2.3                          | 3.3                          |
| sample 4      | 1.9                          | 1.7                           | 2.8                          | 3.7                          |
| sample 5      | 1.6                          | 2.1                           | 1.7                          | 2.4                          |
| sample 6      | 1.8                          | 2.3                           | 2.2                          | 2.9                          |
| Mean $\pm$ SD | 1.65 $\pm$ 0.16 <sup>a</sup> | 2.17 $\pm$ 0.29 <sup>ab</sup> | 2.3 $\pm$ 0.36 <sup>ab</sup> | 2.97 $\pm$ 0.47 <sup>b</sup> |

a P < 0.05 compared with NCG

b P < 0.05 compared with VCG

Table S9. Fasting serum insulin (mU/L) of all animals. Value=mean  $\pm$  SD (N=6)

|          | VCG  | PCG  | MTG  | NCG  |
|----------|------|------|------|------|
| sample 1 | 5.88 | 7.1  | 4.96 | 7.91 |
| sample 2 | 6.07 | 6.66 | 4.97 | 5.94 |



|          |           |           |           |         |
|----------|-----------|-----------|-----------|---------|
| sample 3 | 5.66      | 5.81      | 5.96      | 6.66    |
| sample 4 | 6.42      | 5.74      | 6.7       | 6.22    |
| sample 5 | 6.99      | 6.19      | 6.85      | 10.3    |
| sample 6 | 8.33      | 9.34      | 8.42      | 8       |
| Mean±SD  | 6.56±0.98 | 6.81±1.34 | 6.31±1.31 | 7.5±1.6 |

a P < 0.05 compared with NCG

b P < 0.05 compared with VCG

Table S10. HOMA-IR of all animals. Value=mean ± SD (N=6)

|          | VCG                    | PCG                     | MTG                     | NCG                    |
|----------|------------------------|-------------------------|-------------------------|------------------------|
| sample 1 | 1.23                   | 4.57                    | 1.98                    | 7.03                   |
| sample 2 | 1.24                   | 3.38                    | 2.48                    | 3.96                   |
| sample 3 | 1.23                   | 2.69                    | 2.38                    | 5.45                   |
| sample 4 | 1.37                   | 2.45                    | 4.05                    | 4.73                   |
| sample 5 | 1.34                   | 2.03                    | 3.1                     | 9.77                   |
| sample 6 | 1.85                   | 3.86                    | 2.88                    | 7.04                   |
| Mean±SD  | 1.38±0.24 <sup>a</sup> | 3.16±0.95 <sup>ab</sup> | 2.81±0.72 <sup>ab</sup> | 6.33±2.09 <sup>b</sup> |

a P < 0.05 compared with NCG

b P < 0.05 compared with VCG

Table S11. HOMA-IS of all animals. Value=mean ± SD (N=6)

|          | VCG                    | PCG                     | MTG                     | NCG                    |
|----------|------------------------|-------------------------|-------------------------|------------------------|
| sample 1 | 28.1                   | 11.0                    | 12.4                    | 8.9                    |
| sample 2 | 29.7                   | 13.2                    | 9.99                    | 8.91                   |
| sample 3 | 26.0                   | 12.6                    | 14.9                    | 8.14                   |
| sample 4 | 30.1                   | 13.5                    | 11.1                    | 8.19                   |
| sample 5 | 36.6                   | 18.8                    | 15.1                    | 10.8                   |
| sample 6 | 37.5                   | 22.6                    | 24.6                    | 9.09                   |
| Mean±SD  | 31.3±4.66 <sup>a</sup> | 15.3±4.46 <sup>ab</sup> | 14.7±5.27 <sup>ab</sup> | 9.01±0.96 <sup>b</sup> |

a P < 0.05 compared with NCG

b P < 0.05 compared with VCG

Table S12. HOMA-β (%) of all animals. Value=mean ± SD (N=6)

|          | VCG                   | PCG                     | MTG                     | NCG                    |
|----------|-----------------------|-------------------------|-------------------------|------------------------|
| sample 1 | 97.9                  | 12.9                    | 18.0                    | 9.59                   |
| sample 2 | 110                   | 16.9                    | 12.9                    | 10.3                   |
| sample 3 | 80.9                  | 16.8                    | 21.7                    | 8.94                   |
| sample 4 | 98.8                  | 18.8                    | 13.3                    | 9.15                   |
| sample 5 | 174                   | 31.7                    | 20.4                    | 11.5                   |
| sample 6 | 111                   | 32.2                    | 40.1                    | 9.81                   |
| Mean±SD  | 112±32.5 <sup>a</sup> | 21.6±8.29 <sup>ab</sup> | 21.1±9.99 <sup>ab</sup> | 9.88±0.92 <sup>b</sup> |

a P < 0.05 compared with NCG

b P < 0.05 compared with VCG

Table S13. Clinical chemistry parameters of all animals. Value=mean  $\pm$  SD (N=6)

|     | TG                           | CHO                          | HDL             | LDL                          | ALT                          | AST                         | ALP                          |
|-----|------------------------------|------------------------------|-----------------|------------------------------|------------------------------|-----------------------------|------------------------------|
| VCG | 0.42 $\pm$ 0.1 <sup>a</sup>  | 1.13 $\pm$ 0.16 <sup>a</sup> | 1.18 $\pm$ 0.14 | 0.27 $\pm$ 0.03 <sup>a</sup> | 46.2 $\pm$ 7.7 <sup>a</sup>  | 254 $\pm$ 32.7 <sup>a</sup> | 74.5 $\pm$ 5.3 <sup>a</sup>  |
| PCG | 0.45 $\pm$ 0.19 <sup>a</sup> | 1.12 $\pm$ 0.2 <sup>a</sup>  | 1.14 $\pm$ 0.18 | 0.21 $\pm$ 0.02 <sup>a</sup> | 49.2 $\pm$ 14.8              | 200 $\pm$ 50 <sup>a</sup>   | 164 $\pm$ 48 <sup>ab</sup>   |
| MTG | 0.4 $\pm$ 0.26 <sup>a</sup>  | 1.1 $\pm$ 0.44 <sup>a</sup>  | 1.08 $\pm$ 0.16 | 0.22 $\pm$ 0.07 <sup>a</sup> | 51.7 $\pm$ 18.7              | 185 $\pm$ 40 <sup>a</sup>   | 186 $\pm$ 60.2 <sup>ab</sup> |
| NCG | 1.06 $\pm$ 0.34 <sup>b</sup> | 1.6 $\pm$ 0.33 <sup>b</sup>  | 1 $\pm$ 0.15    | 0.58 $\pm$ 0.15 <sup>b</sup> | 60.3 $\pm$ 21.6 <sup>b</sup> | 130 $\pm$ 28.2 <sup>b</sup> | 320 $\pm$ 79.7 <sup>b</sup>  |

a P < 0.05 compared with NCG

b P < 0.05 compared with VCG

Table S14. Serum NEFAs levels of all animals. Value=mean  $\pm$  SD (N=6)

|               | VCG             | PCG                           | MTG                           | NCG             |
|---------------|-----------------|-------------------------------|-------------------------------|-----------------|
| sample 1      | 0.57            | 0.33                          | 0.42                          | 0.74            |
| sample 2      | 0.73            | 0.35                          | 0.34                          | 0.63            |
| sample 3      | 0.66            | 0.56                          | 0.11                          | 0.62            |
| sample 4      | 0.77            | 0.38                          | 0.31                          | 1               |
| sample 5      | 0.43            | 0.39                          | 0.27                          | 1.02            |
| sample 6      | 0.59            | 0.58                          | 0.5                           | 0.65            |
| Mean $\pm$ SD | 0.63 $\pm$ 0.12 | 0.43 $\pm$ 0.11 <sup>ab</sup> | 0.33 $\pm$ 0.13 <sup>ab</sup> | 0.78 $\pm$ 0.19 |

a P < 0.05 compared with NCG

b P < 0.05 compared with VCG

Table S15. Taxa annotated of intestinal microflora. Value=mean  $\pm$  SD (N=6)

| Taxa annotated                                                                      | VCG3                        | PCG3                         | MTG3                          | NCG3                       |
|-------------------------------------------------------------------------------------|-----------------------------|------------------------------|-------------------------------|----------------------------|
| The total of Proteobacteria                                                         | 218 $\pm$ 91                | 412 $\pm$ 118 <sup>ab</sup>  | 238 $\pm$ 93.4 <sup>b</sup>   | 154 $\pm$ 95.4             |
| The total of Firmicutes                                                             | 20099 $\pm$ 928             | 20814 $\pm$ 467              | 16746 $\pm$ 1161 <sup>a</sup> | 18422 $\pm$ 4139           |
| The total of Bacteroidetes                                                          | 1988 $\pm$ 988 <sup>b</sup> | 945 $\pm$ 302 <sup>a</sup>   | 3154 $\pm$ 1233 <sup>b</sup>  | 696 $\pm$ 283 <sup>a</sup> |
| The total of Actinobacteria                                                         | 375 $\pm$ 132               | 408 $\pm$ 136                | 2584 $\pm$ 1823 <sup>a</sup>  | 3515 $\pm$ 4239            |
| Verrucomicrobia Verrucomicrobiae Verrucomicrobiales Verrucomicrobiaceae Akkermansia | 5 $\pm$ 4.5                 | 32 $\pm$ 32                  | 2 $\pm$ 2.3                   | 6 $\pm$ 8.8                |
| Tenericutes Mollicutes RF39                                                         | 93 $\pm$ 41.9 <sup>b</sup>  | 163 $\pm$ 132.1 <sup>b</sup> | 48 $\pm$ 19.1 <sup>ab</sup>   | 14 $\pm$ 7.1 <sup>a</sup>  |
| ProteoGammaproteoPseudomonadales Pseudomonadaceae Pseudomonas                       | 77 $\pm$ 32.4 <sup>b</sup>  | 76 $\pm$ 31.2 <sup>b</sup>   | 51 $\pm$ 30.8                 | 30 $\pm$ 22.9 <sup>a</sup> |
| ProteoGammaproteoPseudomonadales Moraxellaceae Acinetobacter                        | 21 $\pm$ 10.8               | 27 $\pm$ 13.3                | 15 $\pm$ 9.2                  | 12 $\pm$ 7.7               |
| ProteoGammaproteoOceanospirillales Halomonadaceae Halomonas                         | 2 $\pm$ 1.2                 | 3 $\pm$ 1.9                  | 3 $\pm$ 1.8                   | 1 $\pm$ 1                  |
| ProteoGammaproteoEnterobacteriales Enterobacteriaceae Escherichia                   | 13 $\pm$ 10                 | 17 $\pm$ 8.7                 | 33 $\pm$ 44.8                 | 18 $\pm$ 10.1              |
| ProteoDeltaproteoDesulfovibrionales Desulfovibrionaceae                             | 47 $\pm$ 24.3               | 251 $\pm$ 170 <sup>ab</sup>  | 48 $\pm$ 15.1                 | 69 $\pm$ 53.2              |
| ProteoBetaproteoBurkholderiales Comamonadaceae Tepidimonas                          | 2 $\pm$ 3.1                 | 2 $\pm$ 2                    | 1 $\pm$ 0.9                   | 1 $\pm$ 1.6                |
| ProteoBetaproteoBurkholderiales Alcaligenaceae Sutterella                           | 36 $\pm$ 25.1 <sup>b</sup>  | 8 $\pm$ 3.6 <sup>a</sup>     | 69 $\pm$ 38.7 <sup>b</sup>    | 7 $\pm$ 5.2 <sup>a</sup>   |
| ProteoAlphaproteoSphingomonadales Sphingomonadaceae Sphingopyxis                    | 4 $\pm$ 1.2                 | 11 $\pm$ 5.9 <sup>ab</sup>   | 5 $\pm$ 3.4                   | 2 $\pm$ 1.7                |
| ProteoAlphaproteoSphingomonadales Sphingomonadaceae Sphingomonas                    | 1 $\pm$ 1.2                 | 1 $\pm$ 1.5                  | 1 $\pm$ 1.2                   | 8 $\pm$ 15                 |
| ProteoAlphaproteoRhizobiales Phyllobacteriaceae Aminobacter                         | 10 $\pm$ 5.3 <sup>b</sup>   | 9 $\pm$ 2.3 <sup>b</sup>     | 6 $\pm$ 3.3                   | 5 $\pm$ 2.9 <sup>a</sup>   |
| ProteoAlphaproteoRhizobiales Brucellaceae Ochrobactrum                              | 5 $\pm$ 1.5                 | 6 $\pm$ 2.4 <sup>b</sup>     | 4 $\pm$ 1.7                   | 3 $\pm$ 2.4                |
| ProteoAlphaproteoRF32                                                               | 2 $\pm$ 4.4                 | 1 $\pm$ 0.8                  | 4 $\pm$ 4.7                   | 1 $\pm$ 1.6                |
| Firmicutes Erysipelotrichi Erysipelotrichales Erysipelotrichaceae Holdemania        | 2 $\pm$ 1.5                 | 5 $\pm$ 2.2                  | 7 $\pm$ 5.4                   | 3 $\pm$ 1.3                |
| Firmicutes Erysipelotrichi Erysipelotrichales Erysipelotrichaceae Eubacterium       | 26 $\pm$ 10.7               | 545 $\pm$ 457 <sup>a</sup>   | 95 $\pm$ 61.3                 | 514 $\pm$ 574              |
| Firmicutes Erysipelotrichi Erysipelotrichales Erysipelotrichaceae Coprobacillus     | 52 $\pm$ 77.3 <sup>b</sup>  | 286 $\pm$ 262                | 37 $\pm$ 16.1 <sup>b</sup>    | 635 $\pm$ 459 <sup>a</sup> |
| Firmicutes Erysipelotrichi Erysipelotrichales Erysipelotrichaceae Clostridium       | 7 $\pm$ 5.3                 | 21 $\pm$ 12.5 <sup>ab</sup>  | 24 $\pm$ 19.5                 | 5 $\pm$ 4.6                |
| Firmicutes Erysipelotrichi Erysipelotrichales Erysipelotrichaceae Allobaculum       | 43 $\pm$ 11.1               | 133 $\pm$ 129                | 97 $\pm$ 97.1                 | 501 $\pm$ 735              |
| Firmicutes Erysipelotrichi Erysipelotrichales Erysipelotrichaceae                   | 105 $\pm$ 43.8              | 183 $\pm$ 72.1 <sup>b</sup>  | 70 $\pm$ 34.7 <sup>a</sup>    | 66 $\pm$ 55.2              |

|                                                                           |                        |                        |                        |                        |
|---------------------------------------------------------------------------|------------------------|------------------------|------------------------|------------------------|
| Firmicutes Clostridia Clostridiales Veillonellaceae Phascolarctobacterium | 244±137.6 <sup>b</sup> | 56±27 <sup>a</sup>     | 374±319.8              | 52±34.5 <sup>a</sup>   |
| Firmicutes Clostridia Clostridiales Ruminococcaceae Ruminococcus          | 1279±410 <sup>b</sup>  | 338±52.8 <sup>a</sup>  | 769±335                | 328±186 <sup>a</sup>   |
| Firmicutes Clostridia Clostridiales Ruminococcaceae Oscillospira          | 524±169.9 <sup>b</sup> | 342±50.1 <sup>a</sup>  | 715±650.4              | 262±153.5 <sup>a</sup> |
| Firmicutes Clostridia Clostridiales Ruminococcaceae Butyrivibrio          | 3±0.9 <sup>b</sup>     | 9±4.4 <sup>ab</sup>    | 2±1.5                  | 1±1 <sup>a</sup>       |
| Firmicutes Clostridia Clostridiales Ruminococcaceae                       | 4166±626 <sup>b</sup>  | 3036±599 <sup>ab</sup> | 3375±1157              | 2251±864 <sup>a</sup>  |
| Firmicutes Clostridia Clostridiales Peptococcaceae rc4-4                  | 8±6.7                  | 19±9 <sup>a</sup>      | 15±10.5 <sup>b</sup>   | 7±5.6                  |
| Firmicutes Clostridia Clostridiales Mogibacteriaceae                      | 145±27.1               | 308±95.8 <sup>ab</sup> | 151±21.5               | 117±54.6               |
| Firmicutes Clostridia Clostridiales Lachnospiraceae Ruminococcus          | 481±97.7 <sup>b</sup>  | 239±62.2 <sup>ab</sup> | 222±46.5 <sup>ab</sup> | 114±43.1 <sup>a</sup>  |
| Firmicutes Clostridia Clostridiales Lachnospiraceae Roseburia             | 198±121.7 <sup>b</sup> | 45±11.3 <sup>a</sup>   | 105±48.6               | 51±27.6 <sup>a</sup>   |
| Firmicutes Clostridia Clostridiales Lachnospiraceae Dorea                 | 1001±334 <sup>b</sup>  | 2268±636 <sup>a</sup>  | 665±167 <sup>ab</sup>  | 2041±540 <sup>a</sup>  |
| Firmicutes Clostridia Clostridiales Lachnospiraceae Coprococcus           | 640±118.2 <sup>b</sup> | 268±85.3 <sup>a</sup>  | 526±157.3              | 349±153.7 <sup>a</sup> |
| Firmicutes Clostridia Clostridiales Lachnospiraceae Clostridium           | 14±5.4                 | 11±6.4                 | 13±8.7                 | 10±3.8                 |
| Firmicutes Clostridia Clostridiales Lachnospiraceae Blautia producta      | 366±93 <sup>b</sup>    | 1694±239 <sup>a</sup>  | 455±110 <sup>b</sup>   | 1152±471 <sup>a</sup>  |
| Firmicutes Clostridia Clostridiales Lachnospiraceae Blautia               | 1447±270               | 2579±664 <sup>a</sup>  | 1263±231.1             | 1806±704               |
| Firmicutes Clostridia Clostridiales Lachnospiraceae Anaerostipes          | 12±6.6 <sup>b</sup>    | 3±2.3 <sup>a</sup>     | 5±1.6 <sup>a</sup>     | 4±1.7 <sup>a</sup>     |
| Firmicutes Clostridia Clostridiales Lachnospiraceae                       | 2530±169               | 4555±989 <sup>a</sup>  | 3062±683               | 3983±1585              |
| Firmicutes Clostridia Clostridiales Eubacteriaceae Anaerofustis           | 14±6.5                 | 10±2.7                 | 6±2.5                  | 6±5.2                  |
| Firmicutes Clostridia Clostridiales Dehalobacteriaceae Dehalobacterium    | 8±4.6 <sup>b</sup>     | 3±2.8 <sup>a</sup>     | 3±2.2                  | 1±0.5 <sup>a</sup>     |
| Firmicutes Clostridia Clostridiales Clostridiaceae Clostridium            | 231±74 <sup>b</sup>    | 34±10.9 <sup>a</sup>   | 110±71.1 <sup>ab</sup> | 34±20.7 <sup>a</sup>   |
| Firmicutes Clostridia Clostridiales Clostridiaceae                        | 11±4.5                 | 17±13.5                | 12±7                   | 11±3.8                 |
| Firmicutes Clostridia Clostridiales Christensenellaceae Christensenella   | 13±4.1                 | 10±2.7                 | 10±1.5                 | 9±4.5                  |
| Firmicutes Clostridia Clostridiales Christensenellaceae                   | 56±8.8                 | 64±14.4                | 103±47.6               | 54±16.6                |
| Firmicutes Clostridia Clostridiales                                       | 2682±844 <sup>b</sup>  | 1985±352 <sup>b</sup>  | 2122±536 <sup>b</sup>  | 955±456 <sup>a</sup>   |
| Firmicutes Bacilli Turicibacterales Turicibacteraceae Turicibacter        | 25±12.6 <sup>b</sup>   | 91±46.1 <sup>a</sup>   | 95±73.2 <sup>a</sup>   | 79±51.1 <sup>a</sup>   |
| Firmicutes Bacilli Lactobacillales Streptococcaceae Streptococcus         | 10±2.5 <sup>b</sup>    | 97±28.2 <sup>ab</sup>  | 20±10.7                | 47±34 <sup>a</sup>     |
| Firmicutes Bacilli Lactobacillales Streptococcaceae Lactococcus           | 275±214                | 283±139 <sup>b</sup>   | 92±87.9                | 95±92.4                |

|                                                                               |                       |                        |                        |                        |
|-------------------------------------------------------------------------------|-----------------------|------------------------|------------------------|------------------------|
| Firmicutes Bacilli Lactobacillales Lactobacillaceae Lactobacillus             | 3466±1148             | 1230±244 <sup>a</sup>  | 2093±1803              | 2867±1905              |
| Firmicutes Bacilli Lactobacillales Enterococcaceae Enterococcus               | 15±5.4                | 31±24.8                | 32±31.9                | 11±3.7                 |
| Firmicutes Bacilli Lactobacillales Enterococcaceae                            | 2±1.2                 | 15±11.8 <sup>b</sup>   | 4±4.1                  | 3±2.3                  |
| Firmicutes Bacilli Lactobacillales Carnobacteriaceae Granulicatella           | 1±1.4                 | 2±2.9                  | 1±1.2                  | 0±0                    |
| Firmicutes Bacilli Bacillales Staphylococcaceae Staphylococcus                | 1±0.8                 | 3±0.8 <sup>ab</sup>    | 2±0.8 <sup>ab</sup>    | 0±0.4                  |
| Elusimicrobia Elusimicrobia Elusimicrobiales Elusimicrobiaceae Elusimicrobium | 3±0.8 <sup>b</sup>    | 1±0.8 <sup>a</sup>     | 3±4.4                  | 0±0 <sup>a</sup>       |
| Cyano4C0d-2 YS2                                                               | 11±8.2 <sup>b</sup>   | 5±3.5                  | 17±17.4                | 1±2.4 <sup>a</sup>     |
| Bacteroidetes Bacteroidia Bacteroidales S24-7                                 | 659±241 <sup>b</sup>  | 471±258                | 1439±841 <sup>b</sup>  | 314±110 <sup>a</sup>   |
| Bacteroidetes Bacteroidia Bacteroidales Rikenellaceae                         | 27±18.5 <sup>b</sup>  | 7±5.8 <sup>a</sup>     | 11±7.4                 | 3±1.5 <sup>a</sup>     |
| Bacteroidetes Bacteroidia Bacteroidales Prevotellaceae Prevotella             | 975±664 <sup>b</sup>  | 123±27 <sup>a</sup>    | 1005±505 <sup>b</sup>  | 87±48.1 <sup>a</sup>   |
| Bacteroidetes Bacteroidia Bacteroidales Porphyromonadaceae Parabacteroides    | 38±37.3               | 56±10.4                | 128±80.6 <sup>ab</sup> | 47±31.1                |
| Bacteroidetes Bacteroidia Bacteroidales Paraprevotellaceae Prevotella         | 55±18.9 <sup>b</sup>  | 31±14.3 <sup>b</sup>   | 35±25.6 <sup>b</sup>   | 6±3.7 <sup>a</sup>     |
| Bacteroidetes Bacteroidia Bacteroidales Paraprevotellaceae Paraprevotella     | 1±2                   | 0±0.8                  | 3±6.9                  | 1±0.5                  |
| Bacteroidetes Bacteroidia Bacteroidales Odoribacteraceae Odoribacter          | 9±6.9 <sup>b</sup>    | 1±0.8 <sup>a</sup>     | 2±3.2                  | 0±0 <sup>a</sup>       |
| Bacteroidetes Bacteroidia Bacteroidales Odoribacteraceae Butyricimonas        | 6±5.1                 | 6±2.3                  | 28±26.2                | 4±2.4                  |
| Bacteroidetes Bacteroidia Bacteroidales Bacteroidaceae Bacteroides            | 190±175               | 248±64.2               | 500±212 <sup>a</sup>   | 230±133                |
| Bacteroidetes Bacteroidia Bacteroidales                                       | 28±27.3               | 4±2.7                  | 5±3.6                  | 5±12.2                 |
| ActinoCoriobacteriia Coriobacteriales Coriobacteriaceae Collinsella           | 35±14                 | 130±70.9 <sup>a</sup>  | 29±11.6                | 199±212                |
| ActinoCoriobacteriia Coriobacteriales Coriobacteriaceae Adlercreutzia         | 135±61.2 <sup>b</sup> | 58±14 <sup>a</sup>     | 89±29.9                | 63±28 <sup>a</sup>     |
| ActinoCoriobacteriia Coriobacteriales Coriobacteriaceae                       | 150±59.8              | 68±16.2 <sup>a</sup>   | 327±96.3 <sup>a</sup>  | 311±305                |
| ActinoActinoBifidobacteriales Bifidobacteriaceae Bifidobacterium              | 37±30.4 <sup>b</sup>  | 117±63.6 <sup>ab</sup> | 2124±1726 <sup>a</sup> | 2924±4347 <sup>a</sup> |
| ActinoActinoBifidobacteriales Bifidobacteriaceae                              | 0±0.4 <sup>b</sup>    | 3±1.2 <sup>a</sup>     | 0±0.5 <sup>b</sup>     | 2±1.4 <sup>a</sup>     |
| ActinoActinoActinomycetales Nocardioidaceae Aeromicrobium                     | 4±1.6 <sup>b</sup>    | 3±1.9                  | 2±1.4                  | 2±1.5 <sup>a</sup>     |
| ActinoActinoActinomycetales Nocardiaceae Rhodococcus                          | 2±1.8                 | 1±0.5                  | 2±0.5                  | 1±0.8                  |
| ActinoActinoActinomycetales Micrococcaceae Rothia                             | 12±3.7                | 24±18.7                | 9±4.9 <sup>a</sup>     | 11±5.9                 |
| ActinoActinoActinomycetales Brevibacteriaceae Brevibacterium                  | 2±1.5                 | 4±2.3                  | 2±1.3                  | 2±2                    |

a,  $P < 0.05$  compared with VCG

b,  $P < 0.05$  compared with NCG
